# Supplementary material
Source: HighWire-hosted journal article supplement (https://bmjopen.bmj.com/content/12/7/e062572)
Supplement: inline-supplementary-material-1 [file inline-supplementary-material-1.pdf]

## Appendix 1

1. ("Databases as Topic"[mh] OR database\*[tiab] OR "health care databases"[tiab] OR "healthcare databases"[tiab] OR "health care database"[tiab] OR "healthcare database"[tiab] OR "healthcare data"[tiab] OR "health care data"[tiab] OR "national database"[tiab])
2. ((health information exchange [tw] OR hie [tw] OR rhio [tw] OR regional health information organization [tw] OR hl7 [tw] OR health level seven [tw] OR unified medical language system [majr] OR umls [tw] OR loinc [tw] OR rxnorm [tw] OR snomed [tw] OR icd9 cm [ti] OR icd 9 cm [ti] OR icd10 [ti] OR icd 10 [ti] OR metathesaurus [tw] OR patient card [tw] OR patient cards [tw] OR health card [tw] OR health cards [tw] OR electronic health data [tw] OR personal health data [tw] OR personal health record [tw] OR personal health records [tw] OR Health Records, Personal [Majr] OR Health Record, Personal [Majr] OR ehealth [tw] OR e-health [tw] OR medical informatics application [mh] OR medical informatics applications [mh] OR medical records system, computerized [mh] OR medical records systems, computerized [mh] OR computerized patient medical records [tw] OR automated medical record system [tw] OR automated medical record systems [tw] OR automated medical records system [tw] OR automated medical records systems [tw] OR computerized medical record [tw] OR computerized medical records [tw] OR computerized patient records [tw] OR computerized patient record [tw] OR computerized patient medical record [tw] OR electronic health record [tw] OR electronic health records [tw] OR Electronic Health Record [Majr] OR Electronic Health Records [Majr] OR electronic patient record [tw] OR electronic patient records [tw] OR electronic medical record [tw] OR electronic medical records [tw] OR electronic healthcare records [tw] OR electronic healthcare record [tw] OR electronic health care record [tw] OR electronic health care records [tw] OR archives [majr] OR ehr [tw] OR ehrc [tw] OR phr [tw] OR phrs [tw] OR emr [tw] OR emrs [tw] OR Health Information Systems [Majr] OR health information interoperability[mh] OR health information interoperability[tw]) AND (medical record [ti] OR medical records [mh] OR medical records [ti] OR patient record [ti] OR patient records [ti] OR patient

health record [ti] OR patient health records [ti] OR patient identification system [mh] OR patient identification systems [mh] OR Patient Outcome Assessment[Majr] OR Patient Discharge Summaries[Majr] OR healthcare record [ti] OR healthcare records [ti] OR health care record [ti] OR health care records [ti] OR health record [ti] OR health records [ti] OR hospital information system [tw] OR hospital information systems [tw] OR umae [ti] OR attitude to computers [mh] OR medical informatics [ti] OR Information Technology[mh] OR Information Technology[tw])) OR ((medical records systems, computerized [majr] OR medical records systems, computerized [mh] OR computerized patient medical record [tw] OR computerized patient medical records [tw] OR automated medical record system [tw] OR automated medical record systems [tw] OR automated medical records system [tw] OR automated medical records systems [tw] OR computerized medical record [tw] OR computerized medical records [tw] OR computerized patient records [tw] OR computerized patient record [tw] OR patient generated health data[mh] OR patient generated health data[tw] OR electronic health record [tw] OR electronic health records [tw] OR electronic patient record [tw] OR electronic patient records [tw] OR electronic medical record [tw] OR electronic medical records [tw] OR electronic healthcare records [tw] OR electronic healthcare record [tw] OR electronic health care record [tw] OR electronic health care records [tw] OR unified medical language system [majr] OR unified medical language system [tw] OR umls [tw] OR loinc [tw] OR rxnorm [tw] OR snomed [tw] OR icd9 cm [ti] OR icd 9 cm [ti] OR icd10 [ti] OR icd 10 [ti] OR metathesaurus [tw] OR ehr [tw] OR ehrr [tw] OR phr [tw] OR phrs [tw] OR emr [tw] OR emrs [tw] OR meaningful use [tiab] OR meaningful use [tw] OR Meaningful Use [Majr]) AND (j ahima [ta] OR j am med inform assoc [ta] OR amia annu symp proc [ta] OR health data manag [ta] OR int j med inform [ta] OR yearb med inform [ta] OR telemed j e health [ta] OR stud health technol inform [ta]))

3. (Administrative[tiab] OR Claims[tiab] OR “routine data” [tiab] OR “routinely collected” [tiab])

4. #1 OR #2 OR #3

5. “Academic medicine: journal of the Association of American Medical Colleges”[journal] OR “AJR. American journal of roentgenology”[journal] OR “American family physician”[journal] OR “American heart journal”[journal] OR “The American journal of cardiology”[journal] OR “The American journal of clinical nutrition”[journal] OR “American journal of clinical pathology”[journal] OR “The American journal of medicine”[journal] OR “The American journal of nursing”[journal] OR “American journal of obstetrics and gynecology”[journal] OR “American journal of ophthalmology”[journal] OR “Am J Pathol”[journal] OR “American journal of physical medicine & rehabilitation”[journal] OR “The American journal of psychiatry”[journal] OR “American journal of public health”[journal] OR “American journal of respiratory and critical care medicine”[journal] OR “American journal of surgery”[journal] OR “The American journal of the medical sciences”[journal] OR “The American journal of tropical medicine and hygiene”[journal] OR “Anaesthesia”[journal] OR “Anesthesia and analgesia”[journal] OR “Anesthesiology”[journal] OR “Annals of emergency medicine”[journal] OR “Annals of internal medicine”[journal] OR “The Annals of otology, rhinology, and laryngology”[journal] OR “Annals of surgery”[journal] OR “The Annals of thoracic surgery”[journal] OR “Archives of disease in childhood”[journal] OR “Archives of disease in childhood. Fetal and neonatal edition”[journal] OR “Archives of environmental & occupational health”[journal] OR “Archives of pathology & laboratory medicine”[journal] OR “Archives of physical medicine and rehabilitation”[journal] OR “Arthritis & rheumatology (Hoboken, N.J.)”[journal] OR “BJOG : an international journal of obstetrics and gynaecology”[journal] OR “Blood”[journal] OR “BMJ (Clinical research ed.)”[journal] OR “The bone & joint journal”[journal] OR “Brain: a journal of neurology”[journal] OR “The British journal of radiology”[journal] OR “The British journal of surgery”[journal] OR “CA: a cancer journal for clinicians”[journal] OR “Cancer”[journal] OR “Chest”[journal] OR “Circulation”[journal] OR “Clinical orthopaedics and related research”[journal] OR “Clinical pediatrics”[journal] OR “Clinical pharmacology and therapeutics”[journal] OR “Clinical toxicology

(Philadelphia, Pa.)”[journal] OR “CMAJ : Canadian Medical Association journal = journal de l'Association medicale canadienne”[journal] OR “Critical care medicine”[journal] OR “Current problems in surgery”[journal] OR “Diabetes”[journal] OR “Digestive diseases and sciences”[journal] OR “Disease-a-month : DM”[journal] OR “Endocrinology”[journal] OR “Gastroenterology”[journal] OR “Gut”[journal] OR “Heart (British Cardiac Society)”[journal] OR “Heart & lung : the journal of critical care”[journal] OR “Hospital practice (1995)”[journal] OR “JAMA”[journal] OR “JAMA dermatology”[journal] OR “JAMA internal medicine”[journal] OR “JAMA neurology”[journal] OR “JAMA ophthalmology”[journal] OR “JAMA otolaryngology-- head & neck surgery”[journal] OR “JAMA pediatrics”[journal] OR “JAMA psychiatry”[journal] OR “JAMA surgery”[journal] OR “The Journal of allergy and clinical immunology”[journal] OR “The Journal of bone and joint surgery. American volume”[journal] OR “The Journal of clinical endocrinology and metabolism”[journal] OR “The Journal of clinical investigation”[journal] OR “Journal of clinical pathology”[journal] OR “The Journal of family practice”[journal] OR “Journal of immunology (Baltimore, Md : 1950)”[journal] OR “The Journal of infectious diseases”[journal] OR “The Journal of laryngology and otology”[journal] OR “The Journal of nervous and mental disease”[journal] OR “Journal of neurosurgery”[journal] OR “The Journal of nursing administration”[journal] OR “Journal of oral and maxillofacial surgery : official journal of the American Association of Oral and Maxillofacial Surgeons”[journal] OR “The Journal of pediatrics”[journal] OR “Journal of the Academy of Nutrition and Dietetics”[journal] OR “Journal of the American College of Cardiology”[journal] OR “Journal of the American College of Surgeons”[journal] OR “The Journal of thoracic and cardiovascular surgery”[journal] OR “The Journal of trauma and acute care surgery”[journal] OR “The Journal of urology”[journal] OR “The journals of gerontology. Series A, Biological sciences and medical sciences”[journal] OR “The journals of gerontology. Series B, Psychological sciences and social sciences”[journal] OR “Lancet (London, England)”[journal] OR “Mayo Clinic proceedings.”[journal] OR “The Medical clinics of North America”[journal] OR “The

Medical letter on drugs and therapeutics"[journal] OR "Medicine"[journal] OR "Neurology"[journal] OR "The New England journal of medicine"[journal] OR "The Nursing clinics of North America"[journal] OR "Nursing outlook"[journal] OR "Nursing research"[journal] OR "Obstetrics and gynecology"[journal] OR "The Orthopedic clinics of North America"[journal] OR "Pediatric clinics of North America"[journal] OR "Pediatrics"[journal] OR "Physical therapy"[journal] OR "Plastic and reconstructive surgery"[journal] OR "Postgraduate medicine"[journal] OR "Progress in cardiovascular diseases"[journal] OR "Public health reports (Washington, D.C. : 1974)"[journal] OR "Radiologic clinics of North America"[journal] OR "Radiology"[journal] OR "Rheumatology (Oxford, England)"[journal] OR "Southern medical journal"[journal] OR "Surgery"[journal] OR "The Surgical clinics of North America"[journal] OR "Translational research : the journal of laboratory and clinical medicine"[journal] OR "The Urologic clinics of North America"[journal]

6. 4 AND 5

7. ("2018/01/01"[Date - Create] : "2020/12/31"[Date - Create])
